# Supplementary material for: Adhesion G Protein-Coupled Receptor Gpr126 (Adgrg6) Expression Profiling in Diseased Mouse, Rat, and Human Kidneys
Source: Cells. 2024 May 18;13(10):874. doi: 10.3390/cells13100874 (PMC11119830; doi:10.3390/cells13100874)
Supplement: Supplementary file 1 [file cells-13-00874-s001.zip › cells-2982543-supplementary_Data S1.xlsx]

## Sheet: Neusser_Hypertension_Glom
Sample Number	Sample Name	Age	Age (Nephro-sclerosis)	Age (Years)	Albumin	Body Mass Index	Body Mass Index (kg/m2)	Body Mass Index (Nephro-sclerosis)	BUN	BUN (mg/dL)	BUN (Nephrosclerosis)	Cholesterol	Creatinine (mg/dL)	Creatinine Clearance	GEO ID	GFR (MDRD)	GFR (MDRD) (ml/min/1.73m2)	GFR (MDRD) (Nephrosclerosis)	Group	Group_2	Height	Mean Blood Pressure	Post-Event Treatment	Pre-Event Treatment	Protein	Proteinuria	Proteinuria (g/24h)	Proteinuria (Nephro-sclerosis)	Sex	Sex (Nephro-sclerosis)	Tissue Type	Treatment (Detailed)	Weight (kg)	Gene / Reporter	log2 median-centered intensity
1	TN1b-control	50 - 59 Years		59	2.9				Less Than 20 mg/dL	14		65	0.9		GSM517369	60 - 89 ml/min/1.73m2	68		Tumor Nephrectomy	Healthy Living Donor					6				Female		Glomeruli	None		ADGRG6	0.72405
2	TN2b-control	50 - 59 Years		59									0.9		GSM517370	60 - 89 ml/min/1.73m2	68		Tumor Nephrectomy	Healthy Living Donor									Female		Glomeruli	None		ADGRG6	1.23136
3	TN3b-control	70 - 79 Years		71					Less Than 20 mg/dL	11			1		GSM517371	30 - 59 ml/min/1.73m2	58		Tumor Nephrectomy	Healthy Living Donor					4.7				Female		Glomeruli	None		ADGRG6	1.11355
4	TN4b-control														GSM517372				Tumor Nephrectomy	Healthy Living Donor									Female		Glomeruli	None		ADGRG6	0.95789
5	NSC1	40 - 49 Years	40 - 49 Years	47		Obese	32.1	Obese	20 - 100 mg/dL	39.21	20 - 100 mg/dL	201	2.58		GSM517355	15 - 29 ml/min/1.73m2	29	15 - 29 ml/min/1.73m2	Nephrosclerosis	Hypertension	180 cm	108.3	RAAS Blocking Antihypertensives Post-Event,Non-RAAS Blocking Antihypertensives Post-Event	RAAS Blocking Antihypertensives Pre-Event,Non-RAAS Blocking Antihypertensives Pre-Event	7.9	Subnephrotic Proteinuria	2.31	Subnephrotic Proteinuria	Male	Male	Glomeruli	ACE-I + ARB, b-blockers, Ca-blockers, Diuretics	104	ADGRG6	0.96486
6	NSC11	70 - 79 Years	70 - 79 Years	77					More Than 100 mg/dL	124	More Than 100 mg/dL		7.46		GSM517362	Less Than 15 ml/min/1.73m2	8	Less Than 15 ml/min/1.73m2	Nephrosclerosis	Hypertension	168 cm		Non-RAAS Blocking Antihypertensives Post-Event,Corticosteroids Post-Event	Non-RAAS Blocking Antihypertensives Pre-Event,Corticosteroids Pre-Event					Male	Male	Glomeruli	Ca-blockers, Diuretics, Steroids		ADGRG6	0.75316
7	NSC12	50 - 59 Years	50 - 59 Years	55	5.2				20 - 100 mg/dL	26	20 - 100 mg/dL	333	0.74	86	GSM517363	60 - 89 ml/min/1.73m2	87	60 - 89 ml/min/1.73m2	Nephrosclerosis	Hypertension		110			7.9	Normal Proteinuria	0.2	Normal Proteinuria	Female	Female	Glomeruli	None	63.4	ADGRG6	0.45439
8	NSC13	70 - 79 Years	70 - 79 Years	76	3.6				20 - 100 mg/dL	72	20 - 100 mg/dL	249	2.2	32	GSM517364	15 - 29 ml/min/1.73m2	23	15 - 29 ml/min/1.73m2	Nephrosclerosis	Hypertension		90	RAAS Blocking Antihypertensives Post-Event,Non-RAAS Blocking Antihypertensives Post-Event,Immunosuppressives Post-Event,Corticosteroids Post-Event	RAAS Blocking Antihypertensives Pre-Event,Non-RAAS Blocking Antihypertensives Pre-Event,Immunosuppressives Pre-Event,Corticosteroids Pre-Event	6.3	Subnephrotic Proteinuria	0.459	Subnephrotic Proteinuria	Female	Female	Glomeruli	ACE-I, Diuretics, Immunosuppressant, Steroids	60.5	ADGRG6	0.44963
9	NSC14	40 - 49 Years	40 - 49 Years	46	3.8	Normal Weight	22.7	Normal Weight	More Than 100 mg/dL	150	More Than 100 mg/dL	222	3.6	36	GSM517365	15 - 29 ml/min/1.73m2	19	15 - 29 ml/min/1.73m2	Nephrosclerosis	Hypertension	178 cm	128.3	Non-RAAS Blocking Antihypertensives Post-Event,Corticosteroids Post-Event,Other Treatments Post-Event	Non-RAAS Blocking Antihypertensives Pre-Event,Corticosteroids Pre-Event,Other Treatments Pre-Event	6.1	Nephrotic Proteinuria	3.38	Nephrotic Proteinuria	Male	Male	Glomeruli	Ca-blockers, Diuretics, Lipid Lowering Agent, Steroids	72	ADGRG6	1.52695
10	NSC15	40 - 49 Years	40 - 49 Years	47									1.1		GSM517366	60 - 89 ml/min/1.73m2	76	60 - 89 ml/min/1.73m2	Nephrosclerosis	Hypertension									Male	Male	Glomeruli	None		ADGRG6	0.3206
11	NSC16	50 - 59 Years	50 - 59 Years	55					20 - 100 mg/dL	46.5	20 - 100 mg/dL		1.53		GSM517367	30 - 59 ml/min/1.73m2	50	30 - 59 ml/min/1.73m2	Nephrosclerosis	Hypertension		123.3	Immunosuppressives Post-Event,Corticosteroids Post-Event	Immunosuppressives Pre-Event,Corticosteroids Pre-Event					Male	Male	Glomeruli	Immunosuppressant, Steroids		ADGRG6	-0.35627
12	NSC18	70 - 79 Years	70 - 79 Years	78	4.1	Overweight	25.7	Overweight	20 - 100 mg/dL	73	20 - 100 mg/dL	257	0.73		GSM517368	60 - 89 ml/min/1.73m2	82	60 - 89 ml/min/1.73m2	Nephrosclerosis	Hypertension	165 cm	98.3	RAAS Blocking Antihypertensives Post-Event,Non-RAAS Blocking Antihypertensives Post-Event,Immunosuppressives Post-Event,Corticosteroids Post-Event	RAAS Blocking Antihypertensives Pre-Event,Non-RAAS Blocking Antihypertensives Pre-Event,Immunosuppressives Pre-Event,Corticosteroids Pre-Event	6.1				Female	Female	Glomeruli	ACE-I, b-blockers, Immunosuppressant, Steroids	70	ADGRG6	0.26008
13	NSC2	40 - 49 Years	40 - 49 Years	49		Overweight	25.4	Overweight	20 - 100 mg/dL	28.01	20 - 100 mg/dL	209	2.66		GSM517356	15 - 29 ml/min/1.73m2	27	15 - 29 ml/min/1.73m2	Nephrosclerosis	Hypertension	185 cm	112	Non-RAAS Blocking Antihypertensives Post-Event	Non-RAAS Blocking Antihypertensives Pre-Event	6.54				Male	Male	Glomeruli	b-blockers, Ca-blockers, Diuretics	87	ADGRG6	0.36391
14	NSC4	40 - 49 Years	40 - 49 Years	49					20 - 100 mg/dL	21	20 - 100 mg/dL		1.6		GSM517357	30 - 59 ml/min/1.73m2	49	30 - 59 ml/min/1.73m2	Nephrosclerosis	Hypertension		93.3			7.9	Subnephrotic Proteinuria	1.8	Subnephrotic Proteinuria	Male	Male	Glomeruli	None	120	ADGRG6	0.23986
15	NSC5	50 - 59 Years	50 - 59 Years	57									2.4	31	GSM517358	30 - 59 ml/min/1.73m2	30	30 - 59 ml/min/1.73m2	Nephrosclerosis	Hypertension			Non-RAAS Blocking Antihypertensives Post-Event	Non-RAAS Blocking Antihypertensives Pre-Event		Normal Proteinuria	0.1	Normal Proteinuria	Male	Male	Glomeruli	b-blockers		ADGRG6	0.49437
16	NSC6	40 - 49 Years	40 - 49 Years	44					Less Than 20 mg/dL	7.2	Less Than 20 mg/dL		2		GSM517359	30 - 59 ml/min/1.73m2	39	30 - 59 ml/min/1.73m2	Nephrosclerosis	Hypertension	178 cm		RAAS Blocking Antihypertensives Post-Event,Non-RAAS Blocking Antihypertensives Post-Event	RAAS Blocking Antihypertensives Pre-Event,Non-RAAS Blocking Antihypertensives Pre-Event	9				Male	Male	Glomeruli	ACE-I, b-blockers		ADGRG6	0.06129
17	NSC7	60 - 69 Years	60 - 69 Years	63	4.2	Overweight	29.1	Overweight	20 - 100 mg/dL	24	20 - 100 mg/dL	251	2	60	GSM517360	30 - 59 ml/min/1.73m2	36	30 - 59 ml/min/1.73m2	Nephrosclerosis	Hypertension	174 cm	93.3	RAAS Blocking Antihypertensives Post-Event,Other Treatments Post-Event	RAAS Blocking Antihypertensives Pre-Event,Other Treatments Pre-Event	7.7	Normal Proteinuria	0.2	Normal Proteinuria	Male	Male	Glomeruli	ARB, Lipid Lowering Agent	88	ADGRG6	-0.07917
18	NSC8	60 - 69 Years	60 - 69 Years	63	4.7	Obese	35.1	Obese	20 - 100 mg/dL	88	20 - 100 mg/dL	240	2.1	48	GSM517361	30 - 59 ml/min/1.73m2	34	30 - 59 ml/min/1.73m2	Nephrosclerosis	Hypertension	181 cm	93	RAAS Blocking Antihypertensives Post-Event,Non-RAAS Blocking Antihypertensives Post-Event,Other Treatments Post-Event	RAAS Blocking Antihypertensives Pre-Event,Non-RAAS Blocking Antihypertensives Pre-Event,Other Treatments Pre-Event	7.3	Nephrotic Proteinuria	4.9	Nephrotic Proteinuria	Male	Male	Glomeruli	ACE-I, b-blockers, Diuretics, Lipid Lowering Agent	115	ADGRG6	0.09716

## Sheet: Berthier_Lupus_Glom
Sample Number	Sample Name	Age	Age (Lupus Nephritis)	Age (Years)	Biopsy ID	Body Mass Index	Body Mass Index (kg/m2)	Body Mass Index (Lupus Nephritis)	Delta GFR (MDRD)	GFR (MDRD)	GFR (MDRD) (Lupus Nephritis)	GFR (MDRD) (ml/min/ 1.73m2)	Group	Mean Blood Pressure	Patient ID	Proteinuria	Proteinuria (g/24h)	Proteinuria (Lupus Nephritis)	Serum Creatinine Level (mg/dL)	Sex	Sex (Lupus Nephritis)	Tissue Type	Weight (kg)	WHO Lupus Nephritis Class	Gene / Reporter	log2 median-centered intensity
1	Lediden473_Glom	50 - 59 Years		56.1	38								Healthy Living Donor		Leiden473					Female		Glomeruli			ADGRG6	1.34487
2	Leiden468_Glom	30 - 39 Years		39.2	33								Healthy Living Donor		Leiden468					Male		Glomeruli			ADGRG6	0.97138
3	Leiden469_Glom	18 - 29 Years		27	34								Healthy Living Donor		Leiden469					Male		Glomeruli			ADGRG6	1.05609
4	Leiden470_Glom				35								Healthy Living Donor		Leiden470					Male		Glomeruli			ADGRG6	0.01653
5	Leiden471_Glom	50 - 59 Years		54.1	36								Healthy Living Donor		Leiden471					Female		Glomeruli			ADGRG6	0.43444
6	Leiden472_Glom	60 - 69 Years		61.2	37								Healthy Living Donor		Leiden472					Female		Glomeruli			ADGRG6	1.0985
7	Leiden474_Glom	60 - 69 Years		63	39								Healthy Living Donor		Leiden474					Female		Glomeruli			ADGRG6	1.47941
8	Leiden475_Glom	70 - 79 Years		70.5	40								Healthy Living Donor		Leiden475					Female		Glomeruli			ADGRG6	0.8468
9	Stanford476_Glom	50 - 59 Years		55	41	Normal Weight	24.4			60 - 89 ml/min/1.73m2		61	Healthy Living Donor	107.67	Stanford476				1.3	Male		Glomeruli	81.6		ADGRG6	1.25886
10	Stanford478_Glom	50 - 59 Years		55.6	42	Normal Weight	23.7			60 - 89 ml/min/1.73m2		75	Healthy Living Donor	104	Stanford478	Normal Proteinuria	0.161		1.09	Male		Glomeruli	72.6		ADGRG6	0.88986
11	Stanford479_Glom	40 - 49 Years		48.3	43	Normal Weight	23.6			More Than 90 ml/min/1.73m2		96	Healthy Living Donor		Stanford479				0.9	Male		Glomeruli	57.4		ADGRG6	0.80638
12	Stanford480_Glom	60 - 69 Years		60.2	45					60 - 89 ml/min/1.73m2		60	Healthy Living Donor		Stanford480				1.3	Male		Glomeruli	74.84		ADGRG6	1.05708
13	Stanford481_Glom	50 - 59 Years		57.3	46					60 - 89 ml/min/1.73m2		73	Healthy Living Donor		Stanford481				1.1	Male		Glomeruli			ADGRG6	2.06056
14	Stanford482_Glom	40 - 49 Years		44.5	47					More Than 90 ml/min/1.73m2		97	Healthy Living Donor	82.67	Stanford482				0.9	Male		Glomeruli	84.5		ADGRG6	0.64782
15	LN401_Glom	30 - 39 Years	30 - 39 Years	37	1	Normal Weight	24.5	Normal Weight	2.3242	60 - 89 ml/min/1.73m2	60 - 89 ml/min/1.73m2	75	Lupus Nephritis	73.33	LN401	Subnephrotic Proteinuria	2.4	Subnephrotic Proteinuria	0.9	Female	Female	Glomeruli	70		ADGRG6	-0.47613
16	LN402_Glom	30 - 39 Years	30 - 39 Years	35.7	2	Normal Weight	22.8	Normal Weight	4.95845	More Than 90 ml/min/1.73m2	More Than 90 ml/min/1.73m2	101	Lupus Nephritis	96.67	LN402	Subnephrotic Proteinuria	2	Subnephrotic Proteinuria	0.7	Female	Female	Glomeruli	62	Class IV	ADGRG6	0.18604
17	LN404_Glom	50 - 59 Years	50 - 59 Years	53	3	Obese	32.6	Obese	49.9655	More Than 90 ml/min/1.73m2	More Than 90 ml/min/1.73m2	94	Lupus Nephritis	103.33	LN404	Subnephrotic Proteinuria	2.1	Subnephrotic Proteinuria	0.9	Male	Male	Glomeruli	91	Class II	ADGRG6	0.67833
18	LN405_Glom	40 - 49 Years	40 - 49 Years	45.9	4				-1.61226	More Than 90 ml/min/1.73m2	More Than 90 ml/min/1.73m2	97	Lupus Nephritis		LN405				0.9	Male	Male	Glomeruli		Class II	ADGRG6	0.36576
19	LN406_Glom	18 - 29 Years	18 - 29 Years	29.2	5	Normal Weight	23.1	Normal Weight	4.45952	60 - 89 ml/min/1.73m2	60 - 89 ml/min/1.73m2	62	Lupus Nephritis	113.33	LN406	Subnephrotic Proteinuria	1	Subnephrotic Proteinuria	1.1	Female	Female	Glomeruli	60	Class IV	ADGRG6	2.16154
20	LN407_Glom	30 - 39 Years	30 - 39 Years	32.7	6	Normal Weight	22.5	Normal Weight	3.08609	60 - 89 ml/min/1.73m2	60 - 89 ml/min/1.73m2	61	Lupus Nephritis	96.67	LN407	Subnephrotic Proteinuria	0.54	Subnephrotic Proteinuria	1.1	Female	Female	Glomeruli	65	Class IV	ADGRG6	1.52835
21	LN408_Glom	40 - 49 Years	40 - 49 Years	46.8	7	Normal Weight	22	Normal Weight	-0.210183	15 - 29 ml/min/1.73m2	15 - 29 ml/min/1.73m2	17	Lupus Nephritis	126.67	LN408	Nephrotic Proteinuria	10.6	Nephrotic Proteinuria	3.2	Female	Female	Glomeruli	62	Class IV	ADGRG6	1.80989
22	LN409_Glom	18 - 29 Years	18 - 29 Years	20.2	8	Normal Weight	20.5	Normal Weight	37.105	60 - 89 ml/min/1.73m2	60 - 89 ml/min/1.73m2	75	Lupus Nephritis	83.33	LN409				1	Female	Female	Glomeruli	58	Class II	ADGRG6	0.68359
23	LN410_Glom	40 - 49 Years	40 - 49 Years	45.5	9	Normal Weight	23.5	Normal Weight	4.62149	30 - 59 ml/min/1.73m2	30 - 59 ml/min/1.73m2	37	Lupus Nephritis	113.33	LN410	Nephrotic Proteinuria	4.2	Nephrotic Proteinuria	1.6	Female	Female	Glomeruli	68	Class IV	ADGRG6	-0.15327
24	LN411_Glom	70 - 79 Years	70 - 79 Years	72	10	Overweight	27.8	Overweight	-1.88048	30 - 59 ml/min/1.73m2	30 - 59 ml/min/1.73m2	58	Lupus Nephritis	100	LN411	Subnephrotic Proteinuria	1.8	Subnephrotic Proteinuria	1.3	Male	Male	Glomeruli	92	Class IV	ADGRG6	-0.15025
25	LN412_Glom	40 - 49 Years	40 - 49 Years	41.7	11	Normal Weight	24.2	Normal Weight	6.95526	30 - 59 ml/min/1.73m2	30 - 59 ml/min/1.73m2	38	Lupus Nephritis	100	LN412	Subnephrotic Proteinuria	0.71	Subnephrotic Proteinuria	1.6	Female	Female	Glomeruli	75	Class IV	ADGRG6	1.09325
26	LN413_Glom	18 - 29 Years	18 - 29 Years	25.8	12	Normal Weight	20.8	Normal Weight	-2.37786	15 - 29 ml/min/1.73m2	15 - 29 ml/min/1.73m2	19	Lupus Nephritis	98.33	LN413				3.1	Female	Female	Glomeruli	56	Class IV	ADGRG6	0.68668
27	LN414_Glom	50 - 59 Years	50 - 59 Years	50.2	13				3.48837	30 - 59 ml/min/1.73m2	30 - 59 ml/min/1.73m2	51	Lupus Nephritis	160	LN414	Subnephrotic Proteinuria	0.9	Subnephrotic Proteinuria	1.2	Female	Female	Glomeruli		Class II	ADGRG6	0.74012
28	LN418_Glom	18 - 29 Years	18 - 29 Years	28.1	14	Normal Weight	19.5	Normal Weight	-0.776793	15 - 29 ml/min/1.73m2	15 - 29 ml/min/1.73m2	20	Lupus Nephritis	113.33	LN418	Nephrotic Proteinuria	4	Nephrotic Proteinuria	3	Female	Female	Glomeruli	50	Class IV	ADGRG6	1.18165
29	LN419_Glom	12 - 17 Years	12 - 17 Years	17.5	15	Normal Weight	20.1	Normal Weight	11.0753	30 - 59 ml/min/1.73m2	30 - 59 ml/min/1.73m2	31	Lupus Nephritis	120	LN419	Nephrotic Proteinuria	8.8	Nephrotic Proteinuria	2.2	Female	Female	Glomeruli	49	Class IV	ADGRG6	1.37302
30	LN423_Glom	30 - 39 Years	30 - 39 Years	31.1	16				-3.14182	More Than 90 ml/min/1.73m2	More Than 90 ml/min/1.73m2	104	Lupus Nephritis	93.33	LN423	Subnephrotic Proteinuria	1	Subnephrotic Proteinuria	0.7	Female	Female	Glomeruli		Class V	ADGRG6	1.55879
31	LN430_Glom	18 - 29 Years	18 - 29 Years	18	17				-5.00156	More Than 90 ml/min/1.73m2	More Than 90 ml/min/1.73m2	102	Lupus Nephritis	96.67	LN430	Nephrotic Proteinuria	3.9	Nephrotic Proteinuria	0.78	Female	Female	Glomeruli	50	Class V	ADGRG6	2.06485
32	LN438_Glom	40 - 49 Years	40 - 49 Years	45.7	18					Less Than 15 ml/min/1.73m2	Less Than 15 ml/min/1.73m2	14	Lupus Nephritis	113.33	LN438	Subnephrotic Proteinuria	1.39	Subnephrotic Proteinuria	3.7	Female	Female	Glomeruli	55	Class III	ADGRG6	1.58891
33	LN440_Glom	40 - 49 Years	40 - 49 Years	42.5	19	Overweight	28.1	Overweight	-4.74483	60 - 89 ml/min/1.73m2	60 - 89 ml/min/1.73m2	73	Lupus Nephritis		LN440	Subnephrotic Proteinuria	0.3	Subnephrotic Proteinuria	0.9	Female	Female	Glomeruli	72	Class IV	ADGRG6	0.46563
34	LN442_Glom	50 - 59 Years	50 - 59 Years	58.2	20	Overweight	25.4	Overweight	-11.0159	30 - 59 ml/min/1.73m2	30 - 59 ml/min/1.73m2	54	Lupus Nephritis		LN442	Subnephrotic Proteinuria	1.5	Subnephrotic Proteinuria	1.1	Female	Female	Glomeruli	65	Class II	ADGRG6	1.70515
35	LN444_Glom				21								Lupus Nephritis		LN444	Subnephrotic Proteinuria	0.35	Subnephrotic Proteinuria	0.6	Female	Female	Glomeruli		Class II	ADGRG6	0.97656
36	LN445_Glom	18 - 29 Years	18 - 29 Years	19.2	22				10.9552	30 - 59 ml/min/1.73m2	30 - 59 ml/min/1.73m2	38	Lupus Nephritis	70	LN445	Nephrotic Proteinuria	3.3	Nephrotic Proteinuria	1.8	Female	Female	Glomeruli		Class IV	ADGRG6	1.10118
37	LN448_Glom	40 - 49 Years	40 - 49 Years	45.2	23								Lupus Nephritis	93.33	LN448	Subnephrotic Proteinuria	2.6	Subnephrotic Proteinuria		Female	Female	Glomeruli		Class IV	ADGRG6	0.74526
38	LN450_Glom	30 - 39 Years	30 - 39 Years	37.2	24	Normal Weight	22.2	Normal Weight	2.1274	60 - 89 ml/min/1.73m2	60 - 89 ml/min/1.73m2	72	Lupus Nephritis	116	LN450	Subnephrotic Proteinuria	1.78	Subnephrotic Proteinuria	1.2	Male	Male	Glomeruli	72	Class III	ADGRG6	0.65316
39	LN451_Glom	18 - 29 Years	18 - 29 Years	22.9	25	Overweight	25.4	Overweight		More Than 90 ml/min/1.73m2	More Than 90 ml/min/1.73m2	99	Lupus Nephritis	92	LN451	Normal Proteinuria	0.27	Normal Proteinuria	1	Male	Male	Glomeruli	85	Class II	ADGRG6	-0.17641
40	LN454_Glom	30 - 39 Years	30 - 39 Years	33.4	26	Normal Weight	20.5	Normal Weight		15 - 29 ml/min/1.73m2	15 - 29 ml/min/1.73m2	22	Lupus Nephritis	118.33	LN454	Nephrotic Proteinuria	5	Nephrotic Proteinuria	2.7	Female	Female	Glomeruli	50	Class III	ADGRG6	0.44031
41	LN462_Glom	18 - 29 Years	18 - 29 Years	19.9	27	Normal Weight	20.3	Normal Weight	14.9866	60 - 89 ml/min/1.73m2	60 - 89 ml/min/1.73m2	63	Lupus Nephritis	83.33	LN462	Nephrotic Proteinuria	5	Nephrotic Proteinuria	1.16	Female	Female	Glomeruli	60	Class III	ADGRG6	0.60774
42	LN463_Glom	18 - 29 Years	18 - 29 Years	22.4	28	Normal Weight	20.1	Normal Weight	-7.98558	60 - 89 ml/min/1.73m2	60 - 89 ml/min/1.73m2	83	Lupus Nephritis	93.33	LN463	Subnephrotic Proteinuria	0.34	Subnephrotic Proteinuria	1.17	Male	Male	Glomeruli	58	Class III	ADGRG6	0.43768
43	LN464_Glom	18 - 29 Years	18 - 29 Years	28.7	29	Normal Weight	23.6	Normal Weight	-2.2847	More Than 90 ml/min/1.73m2	More Than 90 ml/min/1.73m2	97	Lupus Nephritis	83.33	LN464				0.75	Female	Female	Glomeruli	62	Class III	ADGRG6	0.98166
44	LN465_Glom	18 - 29 Years	18 - 29 Years	28.2	30	Underweight	18	Underweight	7.7894	60 - 89 ml/min/1.73m2	60 - 89 ml/min/1.73m2	68	Lupus Nephritis	91.67	LN465	Subnephrotic Proteinuria	1	Subnephrotic Proteinuria	1.03	Female	Female	Glomeruli	54	Class III	ADGRG6	0.05326
45	LN466_Glom	30 - 39 Years	30 - 39 Years	34	31	Overweight	29	Overweight	1.89489	More Than 90 ml/min/1.73m2	More Than 90 ml/min/1.73m2	93	Lupus Nephritis	108	LN466	Subnephrotic Proteinuria	0.5	Subnephrotic Proteinuria	0.98	Male	Male	Glomeruli	94	Class II	ADGRG6	0.36061
46	LN467_Glom	18 - 29 Years	18 - 29 Years	19.4	32	Normal Weight	19.5	Normal Weight	-1.99854	More Than 90 ml/min/1.73m2	More Than 90 ml/min/1.73m2	93	Lupus Nephritis	96.67	LN467	Nephrotic Proteinuria	13	Nephrotic Proteinuria	0.84	Female	Female	Glomeruli	60	Class III	ADGRG6	1.53787
												63.7

## Sheet: Woroniecka_Diabetes_TubInt
Sample Number	Sample Name	Age	Age (Diabetic Nephropathy)	Age (Healthy Living Donor)	Age (Years)	GFR (MDRD)	GFR (MDRD) (Diabetic Nephropathy)	GFR (MDRD) (Healthy Living Donor)	GFR (MDRD) (ml/min/ 1.73m2)	Group	Patient ID	Race/Ethnicity	Race/Ethnicity (Diabetic Nephropathy)	Race/Ethnicity (Healthy Living Donor)	Sex	Sex (Diabetic Nephropathy)	Sex (Healthy Living Donor)	Tissue Type	Gene / Reporter	log2 median-centered intensity
1	160_control_tub	60 - 69 Years		60 - 69 Years	66	30 - 59 ml/min/1.73m2		30 - 59 ml/min/1.73m2	58.9589	Healthy Living Donor	160_control	Hispanic		Hispanic	Female		Female	Tubulointerstitium	ADGRG6	-0.72883
2	172_control_tub	70 - 79 Years		70 - 79 Years	78	30 - 59 ml/min/1.73m2		30 - 59 ml/min/1.73m2	51.0569	Healthy Living Donor	172_control	Hispanic		Hispanic	Female		Female	Tubulointerstitium	ADGRG6	-0.78388
3	177_control_tub	60 - 69 Years		60 - 69 Years	68	60 - 89 ml/min/1.73m2		60 - 89 ml/min/1.73m2	74	Healthy Living Donor	177_control				Male		Male	Tubulointerstitium	ADGRG6	1.05526
4	17_control_tub	50 - 59 Years		50 - 59 Years	56	60 - 89 ml/min/1.73m2		60 - 89 ml/min/1.73m2	83.4337	Healthy Living Donor	17_control	Black or African American		Black or African American	Female		Female	Tubulointerstitium	ADGRG6	0.8414
5	37_control_tub	60 - 69 Years		60 - 69 Years	65	60 - 89 ml/min/1.73m2		60 - 89 ml/min/1.73m2	62	Healthy Living Donor	37_control	Black or African American		Black or African American	Male		Male	Tubulointerstitium	ADGRG6	0.57791
6	53_control_tub	50 - 59 Years		50 - 59 Years	58	30 - 59 ml/min/1.73m2		30 - 59 ml/min/1.73m2	47	Healthy Living Donor	53_control	Black or African American		Black or African American	Female		Female	Tubulointerstitium	ADGRG6	0.63623
7	64_control_tub	30 - 39 Years		30 - 39 Years	36	60 - 89 ml/min/1.73m2		60 - 89 ml/min/1.73m2	72.8129	Healthy Living Donor	64_control	Asian		Asian	Male		Male	Tubulointerstitium	ADGRG6	-0.06489
8	70_control_tub	40 - 49 Years		40 - 49 Years	49	60 - 89 ml/min/1.73m2		60 - 89 ml/min/1.73m2	67	Healthy Living Donor	70_control	White		White	Female		Female	Tubulointerstitium	ADGRG6	0.7773
9	76_control_tub	40 - 49 Years		40 - 49 Years	43	More Than 90 ml/min/1.73m2		More Than 90 ml/min/1.73m2	109	Healthy Living Donor	76_control				Male		Male	Tubulointerstitium	ADGRG6	0.72677
10	77_control_tub	50 - 59 Years		50 - 59 Years	50	More Than 90 ml/min/1.73m2		More Than 90 ml/min/1.73m2	104	Healthy Living Donor	77_control	Asian		Asian	Female		Female	Tubulointerstitium	ADGRG6	1.10839
11	81_control_tub	30 - 39 Years		30 - 39 Years	31	More Than 90 ml/min/1.73m2		More Than 90 ml/min/1.73m2	100	Healthy Living Donor	81_control	Asian		Asian	Male		Male	Tubulointerstitium	ADGRG6	0.69575
12	82_control_tub	40 - 49 Years		40 - 49 Years	49	30 - 59 ml/min/1.73m2		30 - 59 ml/min/1.73m2	56	Healthy Living Donor	82_control	Black or African American		Black or African American	Male		Male	Tubulointerstitium	ADGRG6	1.25222
13	120_DKD_tub	80 - 89 Years	80 - 89 Years		84	30 - 59 ml/min/1.73m2	30 - 59 ml/min/1.73m2		32.4421	Diabetic Nephropathy	120_DKD	Black or African American	Black or African American		Female	Female		Tubulointerstitium	ADGRG6	1.493
14	148_DKD_tub	70 - 79 Years	70 - 79 Years		75	15 - 29 ml/min/1.73m2	15 - 29 ml/min/1.73m2		24.4027	Diabetic Nephropathy	148_DKD	Asian	Asian		Female	Female		Tubulointerstitium	ADGRG6	1.99496
15	162_DKD_tub	50 - 59 Years	50 - 59 Years		54	Less Than 15 ml/min/1.73m2	Less Than 15 ml/min/1.73m2		11	Diabetic Nephropathy	162_DKD	Hispanic	Hispanic		Female	Female		Tubulointerstitium	ADGRG6	0.77649
16	164_DKD_tub	70 - 79 Years	70 - 79 Years		76	15 - 29 ml/min/1.73m2	15 - 29 ml/min/1.73m2		16	Diabetic Nephropathy	164_DKD	Asian	Asian		Male	Male		Tubulointerstitium	ADGRG6	2.20128
17	168_DKD_tub	70 - 79 Years	70 - 79 Years		73	30 - 59 ml/min/1.73m2	30 - 59 ml/min/1.73m2		37.9513	Diabetic Nephropathy	168_DKD	Black or African American	Black or African American		Female	Female		Tubulointerstitium	ADGRG6	2.22667
18	178_DKD_tub	70 - 79 Years	70 - 79 Years		70	15 - 29 ml/min/1.73m2	15 - 29 ml/min/1.73m2		18	Diabetic Nephropathy	178_DKD	Asian	Asian		Female	Female		Tubulointerstitium	ADGRG6	1.10741
19	187_DKD_tub	40 - 49 Years	40 - 49 Years		47	15 - 29 ml/min/1.73m2	15 - 29 ml/min/1.73m2		18	Diabetic Nephropathy	187_DKD	Black or African American	Black or African American		Female	Female		Tubulointerstitium	ADGRG6	2.4647
20	43_DKD_tub	50 - 59 Years	50 - 59 Years		56	Less Than 15 ml/min/1.73m2	Less Than 15 ml/min/1.73m2		10	Diabetic Nephropathy	43_DKD	Black or African American	Black or African American		Female	Female		Tubulointerstitium	ADGRG6	0.56616
21	62_DKD_tub	30 - 39 Years	30 - 39 Years		33	Less Than 15 ml/min/1.73m2	Less Than 15 ml/min/1.73m2		10	Diabetic Nephropathy	62_DKD	Black or African American	Black or African American		Female	Female		Tubulointerstitium	ADGRG6	0.59688
22	67_DKD_tub	60 - 69 Years	60 - 69 Years		67	30 - 59 ml/min/1.73m2	30 - 59 ml/min/1.73m2		40.7832	Diabetic Nephropathy	67_DKD	Black or African American	Black or African American		Male	Male		Tubulointerstitium	ADGRG6	1.22371

## Sheet: Hodgin_FSGS_Glom_Detail
Sample Number	Sample Name	Age	Age (FSGS)	Age (Years)	Creatinine (mg/dL)	Group	Group_2	Hematuria	IFTA (Percent)	Nephrotic Syndrome	Percentage Foot Process Effacement	Percentage Globally Sclerotic	Percentage Glom Affected LM	Proteinuria	Proteinuria (Detailed)	Proteinuria (g/24h)	Race/Ethnicity	Race/Ethnicity (Collapsing FSGS)	Red Cells in Blood	Sex	Sex (FSGS)	Tissue Type	Tubular Atrophy and Interstitial Fibrosis	Tubular Atrophy and Interstitial Fibrosis (FSGS)	Gene / Reporter	log2 median-centered intensity
1	KC03-816	12 - 17 Years		15	1	Normal Kidney	Normal Kidney and Minimal Change Disease	Hematuria Present	0		0	0	0	Anormal Proteinuria	Trace		Black or African American		1+	Male		Glomeruli	None/Minimal Tubular Atrophy and Interstitial Fibrosis		ADGRG6	-1.3264
2	KC05-1788-R	40 - 49 Years		42	1	Normal Kidney	Normal Kidney and Minimal Change Disease	Hematuria Present	0		0	0	0				Black or African American		1+	Female		Glomeruli	None/Minimal Tubular Atrophy and Interstitial Fibrosis		ADGRG6	-0.8713
3	KC05-2237	18 - 29 Years		18	0.7	Normal Kidney	Normal Kidney and Minimal Change Disease	Hematuria Present	0		0	0	0	Anormal Proteinuria	2+ protein		Hispanic			Female		Glomeruli	None/Minimal Tubular Atrophy and Interstitial Fibrosis		ADGRG6	-0.40371
4	KC06-909	0 - 11 Years		9	0.5	Normal Kidney	Normal Kidney and Minimal Change Disease	Hematuria Absent	0		0	0	0	Anormal Proteinuria	2+ protein		White			Male		Glomeruli	None/Minimal Tubular Atrophy and Interstitial Fibrosis		ADGRG6	-0.70661
5	KC07-1888	0 - 11 Years		7	0.4	Normal Kidney	Normal Kidney and Minimal Change Disease	Hematuria Present	0		0	0	0	Anormal Proteinuria	1+ protein		White			Female		Glomeruli	None/Minimal Tubular Atrophy and Interstitial Fibrosis		ADGRG6	3.37389
6	KC08-388	50 - 59 Years		53	1	Normal Kidney	Normal Kidney and Minimal Change Disease	Hematuria Present	0		0	0	0	Anormal Proteinuria	Trace		Black or African American		2+	Female		Glomeruli	None/Minimal Tubular Atrophy and Interstitial Fibrosis		ADGRG6	-0.43022
7	KC08-543	12 - 17 Years		16		Normal Kidney	Normal Kidney and Minimal Change Disease	Hematuria Present	0		0	0	0	Subnephrotic Proteinuria	1.1 g/24h	1.1	Black or African American		2+	Male		Glomeruli	None/Minimal Tubular Atrophy and Interstitial Fibrosis		ADGRG6	0.51319
8	S08-3650	60 - 69 Years		60		Normal Kidney	Normal Kidney and Minimal Change Disease		0		0	0	0							Female		Glomeruli	None/Minimal Tubular Atrophy and Interstitial Fibrosis		ADGRG6	-0.53186
9	SP07-15224	60 - 69 Years		67		Normal Kidney	Normal Kidney and Minimal Change Disease		0		0	0	0							Male		Glomeruli	None/Minimal Tubular Atrophy and Interstitial Fibrosis		ADGRG6	-0.14456
10	KC05-1698	40 - 49 Years	40 - 49 Years	44	3.3	Focal Segmental Glomerulosclerosis	Focal Segmental Glomerulosclerosis	Hematuria Absent	50	Yes	0.75	0.35	0.47	Nephrotic Proteinuria	15 g/24h	15	Black or African American	Black or African American	0	Male	Male	Glomeruli	Moderate Tubular Atrophy and Interstitial Fibrosis	Moderate Tubular Atrophy and Interstitial Fibrosis	ADGRG6	2.49317
11	KC05-1717	30 - 39 Years	30 - 39 Years	38	0.9	Focal Segmental Glomerulosclerosis	Focal Segmental Glomerulosclerosis	Hematuria Absent	5	No	0.9	0	0.1	Subnephrotic Proteinuria	1.6 g/24h	1.6	Black or African American	Black or African American		Male	Male	Glomeruli	None/Minimal Tubular Atrophy and Interstitial Fibrosis	None/Minimal Tubular Atrophy and Interstitial Fibrosis	ADGRG6	-0.38416
12	KC05-1741	30 - 39 Years	30 - 39 Years	35	1.2	Focal Segmental Glomerulosclerosis	Focal Segmental Glomerulosclerosis	Hematuria Absent	20	Yes	0.9	0	0.38	Nephrotic Proteinuria	14 g/24h	14				Female	Female	Glomeruli	Mild Tubular Atrophy and Interstitial Fibrosis	Mild Tubular Atrophy and Interstitial Fibrosis	ADGRG6	1.33784
13	KC06-1306-R	50 - 59 Years	50 - 59 Years	52	4.1	Focal Segmental Glomerulosclerosis	Focal Segmental Glomerulosclerosis	Hematuria Absent	70	Yes	1	0.64	0.27	Nephrotic Proteinuria	6.1 g/24h	6.1	White	White		Male	Male	Glomeruli	Severe Tubular Atrophy and Interstitial Fibrosis	Severe Tubular Atrophy and Interstitial Fibrosis	ADGRG6	2.52881
14	KC06-1826	40 - 49 Years	40 - 49 Years	41	2.1	Focal Segmental Glomerulosclerosis	Focal Segmental Glomerulosclerosis	Hematuria Absent	30	Yes	0.9	0.36	0.36	Nephrotic Proteinuria	10 g/24h	10	Asian	Asian		Female	Female	Glomeruli	Moderate Tubular Atrophy and Interstitial Fibrosis	Moderate Tubular Atrophy and Interstitial Fibrosis	ADGRG6	1.28476
15	KC06-1868	0 - 11 Years	0 - 11 Years	5	0.4	Focal Segmental Glomerulosclerosis	Focal Segmental Glomerulosclerosis	Hematuria Present	0	Yes	1	0.06	0.06	Nephrotic Proteinuria	UPC 4		White	White		Male	Male	Glomeruli	None/Minimal Tubular Atrophy and Interstitial Fibrosis	None/Minimal Tubular Atrophy and Interstitial Fibrosis	ADGRG6	-1.06024
16	KC06-296-R	70 - 79 Years	70 - 79 Years	74	1.2	Focal Segmental Glomerulosclerosis	Focal Segmental Glomerulosclerosis	Hematuria Absent	20	Yes	0.9	0.21	0.11	Nephrotic Proteinuria	7.8 g/24h	7.8	White	White		Female	Female	Glomeruli	Mild Tubular Atrophy and Interstitial Fibrosis	Mild Tubular Atrophy and Interstitial Fibrosis	ADGRG6	-0.80401
17	KC07-1312	50 - 59 Years	50 - 59 Years	54	1.3	Focal Segmental Glomerulosclerosis	Focal Segmental Glomerulosclerosis	Hematuria Absent	15	Yes	1	0.17	0.25	Nephrotic Proteinuria	13.4 g/24h	13.4	White	White		Male	Male	Glomeruli	Mild Tubular Atrophy and Interstitial Fibrosis	Mild Tubular Atrophy and Interstitial Fibrosis	ADGRG6	1.00854
18	K08-482	50 - 59 Years		50		Minimal Change Disease	Normal Kidney and Minimal Change Disease	Hematuria Absent	0	Yes	0.9	0.04	0	Nephrotic Proteinuria	3.7 g/24h	3.7	White			Female		Glomeruli	None/Minimal Tubular Atrophy and Interstitial Fibrosis		ADGRG6	0.12344
19	K08-54	18 - 29 Years		26	0.9	Minimal Change Disease	Normal Kidney and Minimal Change Disease	Hematuria Absent	2	Yes	0.95	0.04	0	Nephrotic Proteinuria	6 g/24h	6	Black or African American			Female		Glomeruli	None/Minimal Tubular Atrophy and Interstitial Fibrosis		ADGRG6	-0.44947
20	KC07-1187	12 - 17 Years		14	0.5	Minimal Change Disease	Normal Kidney and Minimal Change Disease	Hematuria Present	0	Yes	0.9	0	0	Anormal Proteinuria	3+ protein		Black or African American			Male		Glomeruli	None/Minimal Tubular Atrophy and Interstitial Fibrosis		ADGRG6	-0.35705
21	KC07-1465-2	60 - 69 Years		64		Minimal Change Disease	Normal Kidney and Minimal Change Disease						0				White			Female		Glomeruli			ADGRG6	-0.92922
22	KC07-1583	40 - 49 Years		46	0.7	Minimal Change Disease	Normal Kidney and Minimal Change Disease	Hematuria Present	0		0.9	0.12	0	Nephrotic Proteinuria	UPC 8		Black or African American			Female		Glomeruli	None/Minimal Tubular Atrophy and Interstitial Fibrosis		ADGRG6	-0.09002
23	KC07-278	30 - 39 Years		34	1.5	Minimal Change Disease	Normal Kidney and Minimal Change Disease	Hematuria Absent	0	Yes	0.95	0	0	Nephrotic Proteinuria	UPC 5		White			Male		Glomeruli	None/Minimal Tubular Atrophy and Interstitial Fibrosis		ADGRG6	-0.85294
24	KC07-982	50 - 59 Years		56		Minimal Change Disease	Normal Kidney and Minimal Change Disease	Hematuria Absent	0	Yes	1	0.05	0	Anormal Proteinuria	4+ protein		White			Male		Glomeruli	None/Minimal Tubular Atrophy and Interstitial Fibrosis		ADGRG6	-0.28178
						Percentage Glom Affected LM	Tubular Atrophy and Interstitial Fibrosis	Gene / Reporter	log2 median-centered intensity
						0.27	Severe Tubular Atrophy and Interstitial Fibrosis	ADGRG6	2.52881
						0.47	Moderate Tubular Atrophy and Interstitial Fibrosis	ADGRG6	2.49317
						0.38	Mild Tubular Atrophy and Interstitial Fibrosis	ADGRG6	1.33784
						0.36	Moderate Tubular Atrophy and Interstitial Fibrosis	ADGRG6	1.28476
						0.25	Mild Tubular Atrophy and Interstitial Fibrosis	ADGRG6	1.00854
						0.1	None/Minimal Tubular Atrophy and Interstitial Fibrosis	ADGRG6	-0.38416
						0.11	Mild Tubular Atrophy and Interstitial Fibrosis	ADGRG6	-0.80401
						0.06	None/Minimal Tubular Atrophy and Interstitial Fibrosis	ADGRG6	-1.06024

## Sheet: Reich_IgAN_TubInt
Sample Number	Sample Name	Age	Age (IgA Nephropathy)	Age (Years)	Body Mass Index	Body Mass Index (IgA Nephropathy)	Body Mass Index (kg/m2)	GFR (MDRD)	GFR (MDRD) (IgA Nephropathy)	GFR (MDRD) (ml/min/1.73m2)	Group	Patient ID	Proteinuria	Proteinuria (g/24h)	Proteinuria (IgA Nephropathy)	Sex	Sex (IgA Nephropathy)	Tissue Type	Weight (kg)	Gene / Reporter	log2 median-centered intensity
1	TA-LD10_19_30	50 - 59 Years		58.44							Healthy Living Donor	LD10				Female		Tubulointerstitium		ADGRG6	0.21706
2	TA-LD5_19_25	30 - 39 Years		35.01							Healthy Living Donor	LD5				Female		Tubulointerstitium		ADGRG6	-0.2877
3	TA-LD6_19_26	30 - 39 Years		39.21							Healthy Living Donor	LD6				Male		Tubulointerstitium		ADGRG6	-0.03514
4	TA-LD7_19_27	50 - 59 Years		55.77							Healthy Living Donor	LD7				Female		Tubulointerstitium		ADGRG6	-0.35328
5	TA-LD8_19_28	40 - 49 Years		40.99							Healthy Living Donor	LD8				Male		Tubulointerstitium		ADGRG6	-0.05488
6	TA-LD9_19_29	60 - 69 Years		61.91							Healthy Living Donor	LD9				Male		Tubulointerstitium		ADGRG6	0.4259
7	TA-IgA10_3_80	18 - 29 Years	18 - 29 Years	23.71				More Than 90 ml/min/1.73m2	More Than 90 ml/min/1.73m2	131.07	IgA Nephropathy	IgA10	Subnephrotic Proteinuria	0.7	Subnephrotic Proteinuria	Female	Female	Tubulointerstitium		ADGRG6	-0.08061
8	TA-IgA11_5_17	50 - 59 Years	50 - 59 Years	50.33	Normal Weight	Normal Weight	23.9	More Than 90 ml/min/1.73m2	More Than 90 ml/min/1.73m2	108.785	IgA Nephropathy	IgA11				Male	Male	Tubulointerstitium	75	ADGRG6	0.1885
9	TA-IgA12_5_18	30 - 39 Years	30 - 39 Years	34.59	Overweight	Overweight	28.7	60 - 89 ml/min/1.73m2	60 - 89 ml/min/1.73m2	66.4484	IgA Nephropathy	IgA12				Male	Male	Tubulointerstitium	97	ADGRG6	0.39818
10	TA-IgA13_5_26	30 - 39 Years	30 - 39 Years	30.82	Obese	Obese	32	60 - 89 ml/min/1.73m2	60 - 89 ml/min/1.73m2	83.2189	IgA Nephropathy	IgA13	Subnephrotic Proteinuria	3	Subnephrotic Proteinuria	Male	Male	Tubulointerstitium	82	ADGRG6	0.38572
11	TA-IgA14_8_49	12 - 17 Years	12 - 17 Years	14.73	Normal Weight	Normal Weight	21	More Than 90 ml/min/1.73m2	More Than 90 ml/min/1.73m2	121.871	IgA Nephropathy	IgA14	Subnephrotic Proteinuria	0.8	Subnephrotic Proteinuria	Male	Male	Tubulointerstitium	65	ADGRG6	-0.63261
12	TA-IgA16_9_24	40 - 49 Years	40 - 49 Years	46.45	Normal Weight	Normal Weight	23.4	30 - 59 ml/min/1.73m2	30 - 59 ml/min/1.73m2	34.4075	IgA Nephropathy	IgA16				Male	Male	Tubulointerstitium	80	ADGRG6	0.32412
13	TA-IgA18_11_139	18 - 29 Years	18 - 29 Years	22.33	Overweight	Overweight	25.5	15 - 29 ml/min/1.73m2	15 - 29 ml/min/1.73m2	22.6891	IgA Nephropathy	IgA18	Nephrotic Proteinuria	4.2	Nephrotic Proteinuria	Male	Male	Tubulointerstitium	78	ADGRG6	0.11389
14	TA-IgA19_11_140	18 - 29 Years	18 - 29 Years	18.9	Normal Weight	Normal Weight	23.1	More Than 90 ml/min/1.73m2	More Than 90 ml/min/1.73m2	134.653	IgA Nephropathy	IgA19	Nephrotic Proteinuria	4	Nephrotic Proteinuria	Male	Male	Tubulointerstitium	70	ADGRG6	-0.40592
15	TA-IgA1_3_31	30 - 39 Years	30 - 39 Years	36.96	Normal Weight	Normal Weight	23.8	60 - 89 ml/min/1.73m2	60 - 89 ml/min/1.73m2	81.9212	IgA Nephropathy	IgA1	Subnephrotic Proteinuria	0.6	Subnephrotic Proteinuria	Male	Male	Tubulointerstitium	77	ADGRG6	0.1078
16	TA-IgA20_11_151	40 - 49 Years	40 - 49 Years	47.6	Obese	Obese	33	60 - 89 ml/min/1.73m2	60 - 89 ml/min/1.73m2	67.7755	IgA Nephropathy	IgA20	Subnephrotic Proteinuria	1.6	Subnephrotic Proteinuria	Female	Female	Tubulointerstitium	100	ADGRG6	0.14564
17	TA-IgA21_7_9	50 - 59 Years	50 - 59 Years	51.77	Overweight	Overweight	25.2	Less Than 15 ml/min/1.73m2	Less Than 15 ml/min/1.73m2	7.58727	IgA Nephropathy	IgA21				Male	Male	Tubulointerstitium	78	ADGRG6	-0.19198
18	TA-IgA22_7_31	30 - 39 Years	30 - 39 Years	36.51	Obese	Obese	30.5	60 - 89 ml/min/1.73m2	60 - 89 ml/min/1.73m2	89.7513	IgA Nephropathy	IgA22	Subnephrotic Proteinuria	1.3	Subnephrotic Proteinuria	Male	Male	Tubulointerstitium	81	ADGRG6	0.10934
19	TA-IgA23_7_62										IgA Nephropathy	IgA23	Subnephrotic Proteinuria	1.924	Subnephrotic Proteinuria	Female	Female	Tubulointerstitium		ADGRG6	-0.3411
20	TA-IgA24_7_87	30 - 39 Years	30 - 39 Years	35.99	Obese	Obese	32.8	15 - 29 ml/min/1.73m2	15 - 29 ml/min/1.73m2	15.8668	IgA Nephropathy	IgA24	Nephrotic Proteinuria	3.8	Nephrotic Proteinuria	Male	Male	Tubulointerstitium	104	ADGRG6	-0.0962
21	TA-IgA25_7_69	80 - 89 Years	80 - 89 Years	83.89	Overweight	Overweight	25.3	30 - 59 ml/min/1.73m2	30 - 59 ml/min/1.73m2	56.2481	IgA Nephropathy	IgA25	Nephrotic Proteinuria	4.163	Nephrotic Proteinuria	Female	Female	Tubulointerstitium	60	ADGRG6	-0.2815
22	TA-IgA26_7_95	50 - 59 Years	50 - 59 Years	50.69				60 - 89 ml/min/1.73m2	60 - 89 ml/min/1.73m2	62.0333	IgA Nephropathy	IgA26	Subnephrotic Proteinuria	2.5	Subnephrotic Proteinuria	Male	Male	Tubulointerstitium		ADGRG6	0.15753
23	TA-IgA27_7_123	40 - 49 Years	40 - 49 Years	48.33				More Than 90 ml/min/1.73m2	More Than 90 ml/min/1.73m2	95.7447	IgA Nephropathy	IgA27	Nephrotic Proteinuria	10	Nephrotic Proteinuria	Male	Male	Tubulointerstitium		ADGRG6	0.18216
24	TA-IgA2_3_34	30 - 39 Years	30 - 39 Years	35.46	Overweight	Overweight	26.7	60 - 89 ml/min/1.73m2	60 - 89 ml/min/1.73m2	61.2334	IgA Nephropathy	IgA2	Subnephrotic Proteinuria	0.3	Subnephrotic Proteinuria	Male	Male	Tubulointerstitium	80	ADGRG6	0.07941
25	TA-IgA3_3_40	30 - 39 Years	30 - 39 Years	36.08				60 - 89 ml/min/1.73m2	60 - 89 ml/min/1.73m2	72.8984	IgA Nephropathy	IgA3	Subnephrotic Proteinuria	0.3	Subnephrotic Proteinuria	Male	Male	Tubulointerstitium		ADGRG6	0.42781
26	TA-IgA4_3_52	18 - 29 Years	18 - 29 Years	26.97				60 - 89 ml/min/1.73m2	60 - 89 ml/min/1.73m2	66.9347	IgA Nephropathy	IgA4	Subnephrotic Proteinuria	1.66	Subnephrotic Proteinuria	Male	Male	Tubulointerstitium		ADGRG6	0.12913
27	TA-IgA5_3_55	30 - 39 Years	30 - 39 Years	34.61				More Than 90 ml/min/1.73m2	More Than 90 ml/min/1.73m2	98.3545	IgA Nephropathy	IgA5	Normal Proteinuria	0.28	Normal Proteinuria	Female	Female	Tubulointerstitium		ADGRG6	0.31835
28	TA-IgA6_3_57	18 - 29 Years	18 - 29 Years	21.92				60 - 89 ml/min/1.73m2	60 - 89 ml/min/1.73m2	83.4106	IgA Nephropathy	IgA6	Subnephrotic Proteinuria	0.7	Subnephrotic Proteinuria	Female	Female	Tubulointerstitium		ADGRG6	-0.06207
29	TA-IgA7_3_70	18 - 29 Years	18 - 29 Years	27.26				More Than 90 ml/min/1.73m2	More Than 90 ml/min/1.73m2	157.25	IgA Nephropathy	IgA7	Subnephrotic Proteinuria	0.4	Subnephrotic Proteinuria	Female	Female	Tubulointerstitium		ADGRG6	-0.17927
30	TA-IgA8_3_73	30 - 39 Years	30 - 39 Years	31.39				60 - 89 ml/min/1.73m2	60 - 89 ml/min/1.73m2	63.8162	IgA Nephropathy	IgA8	Subnephrotic Proteinuria	2.6	Subnephrotic Proteinuria	Male	Male	Tubulointerstitium		ADGRG6	0.35798
31	TA-IgA9_3_75	18 - 29 Years	18 - 29 Years	26.85				30 - 59 ml/min/1.73m2	30 - 59 ml/min/1.73m2	38.4567	IgA Nephropathy	IgA9	Nephrotic Proteinuria	4.6	Nephrotic Proteinuria	Male	Male	Tubulointerstitium		ADGRG6	0.62642

## Sheet: Reich_IgAN_Glom
Sample Number	Sample Name	Age	Age (IgA Nephropathy)	Age (Years)	Body Mass Index	Body Mass Index (IgA Nephropathy)	Body Mass Index (kg/m2)	GFR (MDRD)	GFR (MDRD) (IgA Nephropathy)	GFR (MDRD) (ml/min/1.73m2)	Group	Patient ID	Proteinuria	Proteinuria (g/24h)	Proteinuria (IgA Nephro-pathy)	Sex	Sex (IgA Nephro-pathy)	Tissue Type	Weight (kg)	Gene / Reporter	log2 median-centered intensity
1	GA-LD10_19_30	50 - 59 Years		58.44							Healthy Living Donor	LD10				Female		Glomeruli		ADGRG6	1.21652
2	GA-LD5_19_25	30 - 39 Years		35.01							Healthy Living Donor	LD5				Female		Glomeruli		ADGRG6	1.45611
3	GA-LD6_19_26	30 - 39 Years		39.21							Healthy Living Donor	LD6				Male		Glomeruli		ADGRG6	0.78177
4	GA-LD7_19_27	50 - 59 Years		55.77							Healthy Living Donor	LD7				Female		Glomeruli		ADGRG6	0.4875
5	GA-LD8_19_28	40 - 49 Years		40.99							Healthy Living Donor	LD8				Male		Glomeruli		ADGRG6	-0.22702
6	GA-LD9_19_29	60 - 69 Years		61.91							Healthy Living Donor	LD9				Male		Glomeruli		ADGRG6	1.24109
7	GA-IgA10_3_80	18 - 29 Years	18 - 29 Years	23.71				More Than 90 ml/min/1.73m2	More Than 90 ml/min/1.73m2	131.07	IgA Nephropathy	IgA10	Subnephrotic Proteinuria	0.7	Subnephrotic Proteinuria	Female	Female	Glomeruli		ADGRG6	0.12088
8	GA-IgA11_5_17	50 - 59 Years	50 - 59 Years	50.33	Normal Weight	Normal Weight	23.9	More Than 90 ml/min/1.73m2	More Than 90 ml/min/1.73m2	108.785	IgA Nephropathy	IgA11				Male	Male	Glomeruli	75	ADGRG6	-2.0244
9	GA-IgA12_5_18	30 - 39 Years	30 - 39 Years	34.59	Overweight	Overweight	28.7	60 - 89 ml/min/1.73m2	60 - 89 ml/min/1.73m2	66.4484	IgA Nephropathy	IgA12				Male	Male	Glomeruli	97	ADGRG6	-0.3639
10	GA-IgA13_5_26	30 - 39 Years	30 - 39 Years	30.82	Obese	Obese	32	60 - 89 ml/min/1.73m2	60 - 89 ml/min/1.73m2	83.2189	IgA Nephropathy	IgA13	Subnephrotic Proteinuria	3	Subnephrotic Proteinuria	Male	Male	Glomeruli	82	ADGRG6	-0.85438
11	GA-IgA14_8_49	12 - 17 Years	12 - 17 Years	14.73	Normal Weight	Normal Weight	21	More Than 90 ml/min/1.73m2	More Than 90 ml/min/1.73m2	121.871	IgA Nephropathy	IgA14	Subnephrotic Proteinuria	0.8	Subnephrotic Proteinuria	Male	Male	Glomeruli	65	ADGRG6	0.09993
12	GA-IgA15_8_72	30 - 39 Years	30 - 39 Years	33.16	Normal Weight	Normal Weight	20.2	30 - 59 ml/min/1.73m2	30 - 59 ml/min/1.73m2	42.5317	IgA Nephropathy	IgA15	Subnephrotic Proteinuria	0.487	Subnephrotic Proteinuria	Female	Female	Glomeruli	53	ADGRG6	2.0598
13	GA-IgA16_9_24	40 - 49 Years	40 - 49 Years	46.45	Normal Weight	Normal Weight	23.4	30 - 59 ml/min/1.73m2	30 - 59 ml/min/1.73m2	34.4075	IgA Nephropathy	IgA16				Male	Male	Glomeruli	80	ADGRG6	0.47345
14	GA-IgA17_11_130	30 - 39 Years	30 - 39 Years	39.13				30 - 59 ml/min/1.73m2	30 - 59 ml/min/1.73m2	56.7354	IgA Nephropathy	IgA17	Subnephrotic Proteinuria	1	Subnephrotic Proteinuria	Male	Male	Glomeruli		ADGRG6	1.34974
15	GA-IgA18_11_139	18 - 29 Years	18 - 29 Years	22.33	Overweight	Overweight	25.5	15 - 29 ml/min/1.73m2	15 - 29 ml/min/1.73m2	22.6891	IgA Nephropathy	IgA18	Nephrotic Proteinuria	4.2	Nephrotic Proteinuria	Male	Male	Glomeruli	78	ADGRG6	0.98304
16	GA-IgA19_11_140	18 - 29 Years	18 - 29 Years	18.9	Normal Weight	Normal Weight	23.1	More Than 90 ml/min/1.73m2	More Than 90 ml/min/1.73m2	134.653	IgA Nephropathy	IgA19	Nephrotic Proteinuria	4	Nephrotic Proteinuria	Male	Male	Glomeruli	70	ADGRG6	0.2195
17	GA-IgA1_3_31	30 - 39 Years	30 - 39 Years	36.96	Normal Weight	Normal Weight	23.8	60 - 89 ml/min/1.73m2	60 - 89 ml/min/1.73m2	81.9212	IgA Nephropathy	IgA1	Subnephrotic Proteinuria	0.6	Subnephrotic Proteinuria	Male	Male	Glomeruli	77	ADGRG6	0.4539
18	GA-IgA20_11_151	40 - 49 Years	40 - 49 Years	47.6	Obese	Obese	33	60 - 89 ml/min/1.73m2	60 - 89 ml/min/1.73m2	67.7755	IgA Nephropathy	IgA20	Subnephrotic Proteinuria	1.6	Subnephrotic Proteinuria	Female	Female	Glomeruli	100	ADGRG6	-0.02966
19	GA-IgA21_7_9	50 - 59 Years	50 - 59 Years	51.77	Overweight	Overweight	25.2	Less Than 15 ml/min/1.73m2	Less Than 15 ml/min/1.73m2	7.58727	IgA Nephropathy	IgA21				Male	Male	Glomeruli	78	ADGRG6	-0.43672
20	GA-IgA22_7_31	30 - 39 Years	30 - 39 Years	36.51	Obese	Obese	30.5	60 - 89 ml/min/1.73m2	60 - 89 ml/min/1.73m2	89.7513	IgA Nephropathy	IgA22	Subnephrotic Proteinuria	1.3	Subnephrotic Proteinuria	Male	Male	Glomeruli	81	ADGRG6	0.65039
21	GA-IgA23_7_62										IgA Nephropathy	IgA23	Subnephrotic Proteinuria	1.924	Subnephrotic Proteinuria	Female	Female	Glomeruli		ADGRG6	0.10074
22	GA-IgA24_7_87	30 - 39 Years	30 - 39 Years	35.99	Obese	Obese	32.8	15 - 29 ml/min/1.73m2	15 - 29 ml/min/1.73m2	15.8668	IgA Nephropathy	IgA24	Nephrotic Proteinuria	3.8	Nephrotic Proteinuria	Male	Male	Glomeruli	104	ADGRG6	-1.27019
23	GA-IgA25_7_69	80 - 89 Years	80 - 89 Years	83.89	Overweight	Overweight	25.3	30 - 59 ml/min/1.73m2	30 - 59 ml/min/1.73m2	56.2481	IgA Nephropathy	IgA25	Nephrotic Proteinuria	4.163	Nephrotic Proteinuria	Female	Female	Glomeruli	60	ADGRG6	0.51638
24	GA-IgA26_7_95	50 - 59 Years	50 - 59 Years	50.69				60 - 89 ml/min/1.73m2	60 - 89 ml/min/1.73m2	62.0333	IgA Nephropathy	IgA26	Subnephrotic Proteinuria	2.5	Subnephrotic Proteinuria	Male	Male	Glomeruli		ADGRG6	0.94112
25	GA-IgA27_7_123	40 - 49 Years	40 - 49 Years	48.33				More Than 90 ml/min/1.73m2	More Than 90 ml/min/1.73m2	95.7447	IgA Nephropathy	IgA27	Nephrotic Proteinuria	10	Nephrotic Proteinuria	Male	Male	Glomeruli		ADGRG6	-0.4832
26	GA-IgA2_3_34	30 - 39 Years	30 - 39 Years	35.46	Overweight	Overweight	26.7	60 - 89 ml/min/1.73m2	60 - 89 ml/min/1.73m2	61.2334	IgA Nephropathy	IgA2	Subnephrotic Proteinuria	0.3	Subnephrotic Proteinuria	Male	Male	Glomeruli	80	ADGRG6	-0.30641
27	GA-IgA3_3_40	30 - 39 Years	30 - 39 Years	36.08				60 - 89 ml/min/1.73m2	60 - 89 ml/min/1.73m2	72.8984	IgA Nephropathy	IgA3	Subnephrotic Proteinuria	0.3	Subnephrotic Proteinuria	Male	Male	Glomeruli		ADGRG6	0.04598
28	GA-IgA4_3_52	18 - 29 Years	18 - 29 Years	26.97				60 - 89 ml/min/1.73m2	60 - 89 ml/min/1.73m2	66.9347	IgA Nephropathy	IgA4	Subnephrotic Proteinuria	1.66	Subnephrotic Proteinuria	Male	Male	Glomeruli		ADGRG6	-0.49877
29	GA-IgA5_3_55	30 - 39 Years	30 - 39 Years	34.61				More Than 90 ml/min/1.73m2	More Than 90 ml/min/1.73m2	98.3545	IgA Nephropathy	IgA5	Normal Proteinuria	0.28	Normal Proteinuria	Female	Female	Glomeruli		ADGRG6	0.05608
30	GA-IgA6_3_57	18 - 29 Years	18 - 29 Years	21.92				60 - 89 ml/min/1.73m2	60 - 89 ml/min/1.73m2	83.4106	IgA Nephropathy	IgA6	Subnephrotic Proteinuria	0.7	Subnephrotic Proteinuria	Female	Female	Glomeruli		ADGRG6	0.44553
31	GA-IgA7_3_70	18 - 29 Years	18 - 29 Years	27.26				More Than 90 ml/min/1.73m2	More Than 90 ml/min/1.73m2	157.25	IgA Nephropathy	IgA7	Subnephrotic Proteinuria	0.4	Subnephrotic Proteinuria	Female	Female	Glomeruli		ADGRG6	1.04127
32	GA-IgA8_3_73	30 - 39 Years	30 - 39 Years	31.39				60 - 89 ml/min/1.73m2	60 - 89 ml/min/1.73m2	63.8162	IgA Nephropathy	IgA8	Subnephrotic Proteinuria	2.6	Subnephrotic Proteinuria	Male	Male	Glomeruli		ADGRG6	0.29921
33	GA-IgA9_3_75	18 - 29 Years	18 - 29 Years	26.85				30 - 59 ml/min/1.73m2	30 - 59 ml/min/1.73m2	38.4567	IgA Nephropathy	IgA9	Nephrotic Proteinuria	4.6	Nephrotic Proteinuria	Male	Male	Glomeruli		ADGRG6	1.36608
